# Supplementary material for: Technical note: Temperature dependence of precipitation tail heaviness in the TENAX model
Source: Copernicus journal article supplement (doi:10.5194/egusphere-2025-4741), 2025-12-03
Supplement: Supplementary file 1 [file egusphere-2025-4741-supplement.pdf]

# Supplementary material

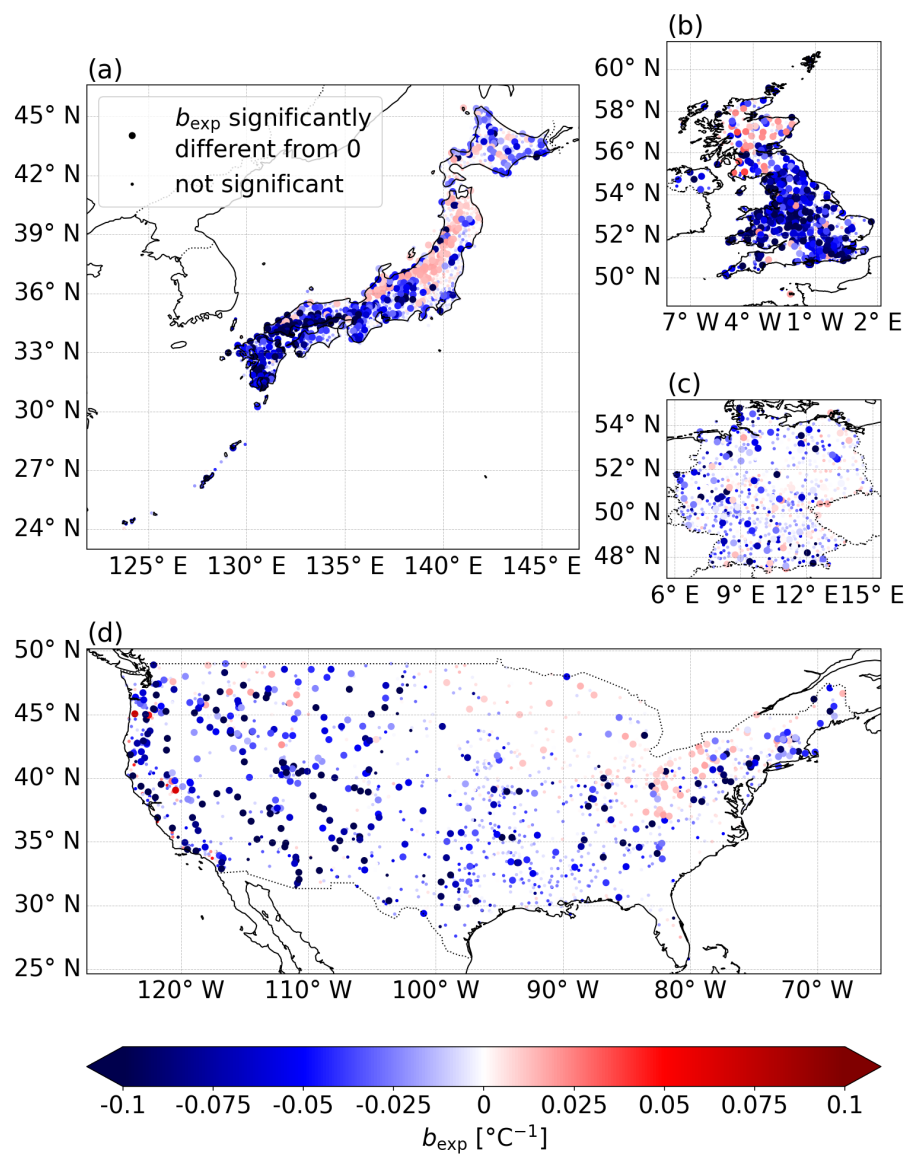

**Figure S1.** As Figure 1, but for the case where  $b$  is fitted using an exponential dependence.

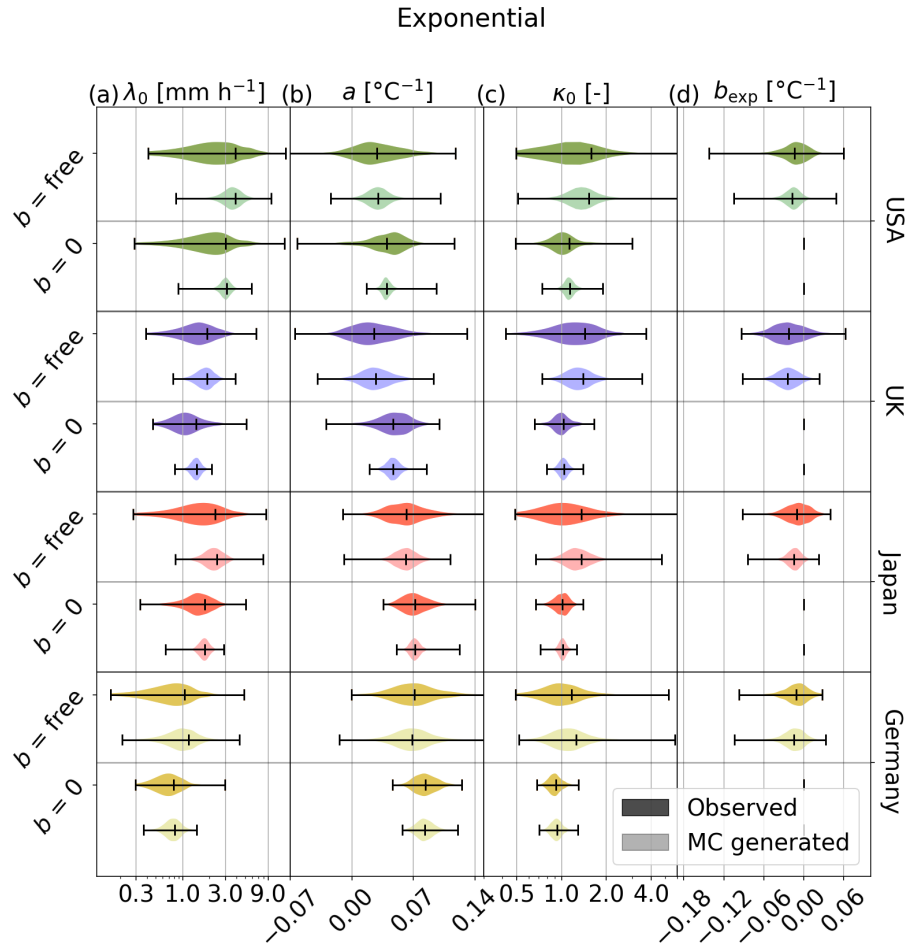

**Figure S2.** As Figure 2, but when  $b$  is fitted using an exponential dependence.

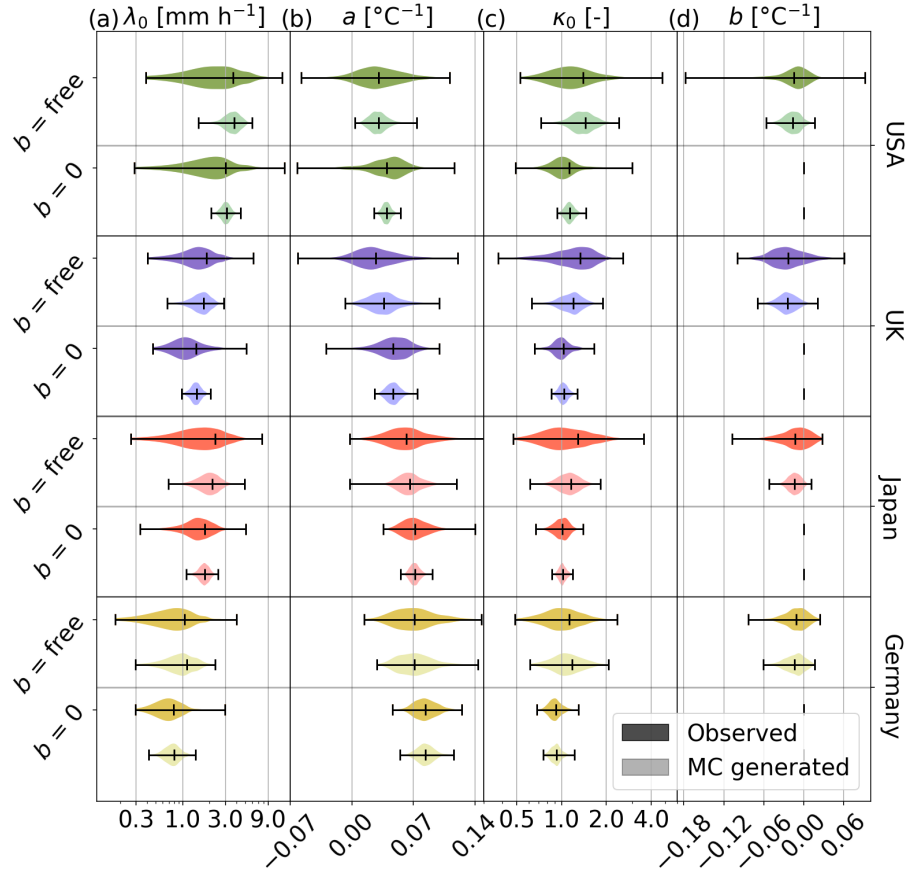

**Figure S3.** Distribution of parameters of the magnitude model in the USA (green), UK (blue), Japan (red), and Germany (yellow). The darker plots are the observed values, and the lighter plots are the Monte Carlo generated values. In each country, the upper two plots are the parameters when  $b$  is fitted freely, and the lower two plots are the parameters when  $b = 0$ . This is with the same average number of events in each simulation.

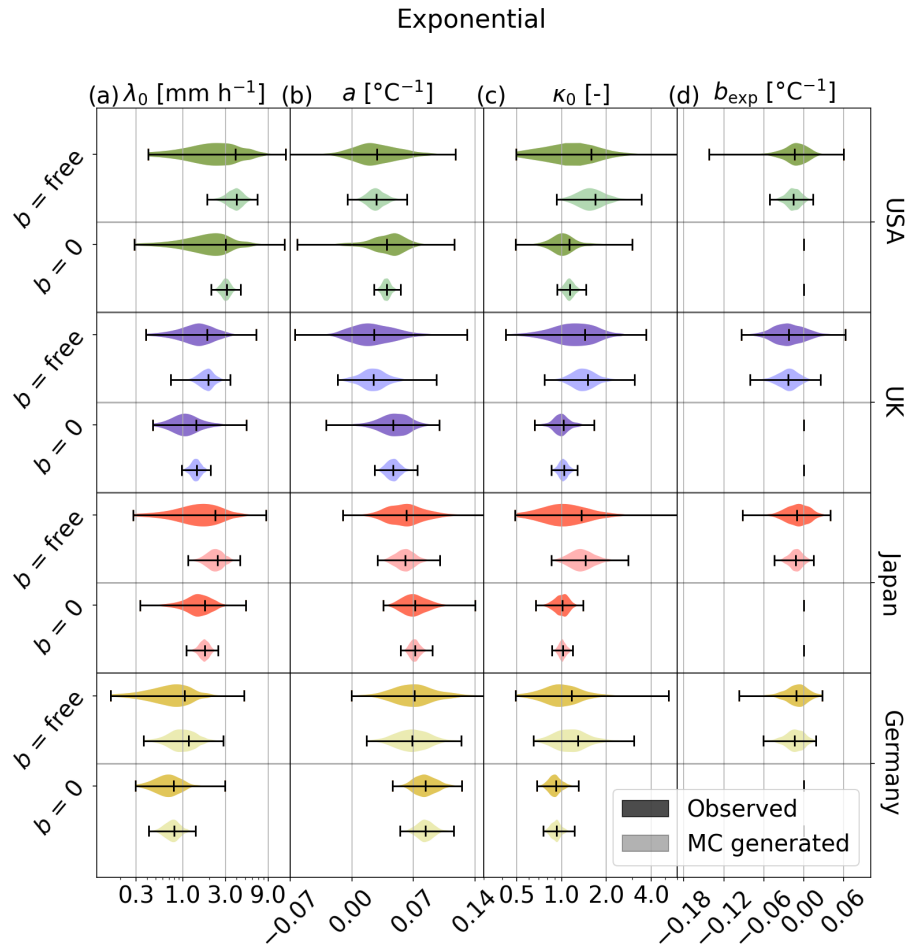

**Figure S4.** As Supplementary Figure S3, but when  $b$  is fitted using an exponential dependence.

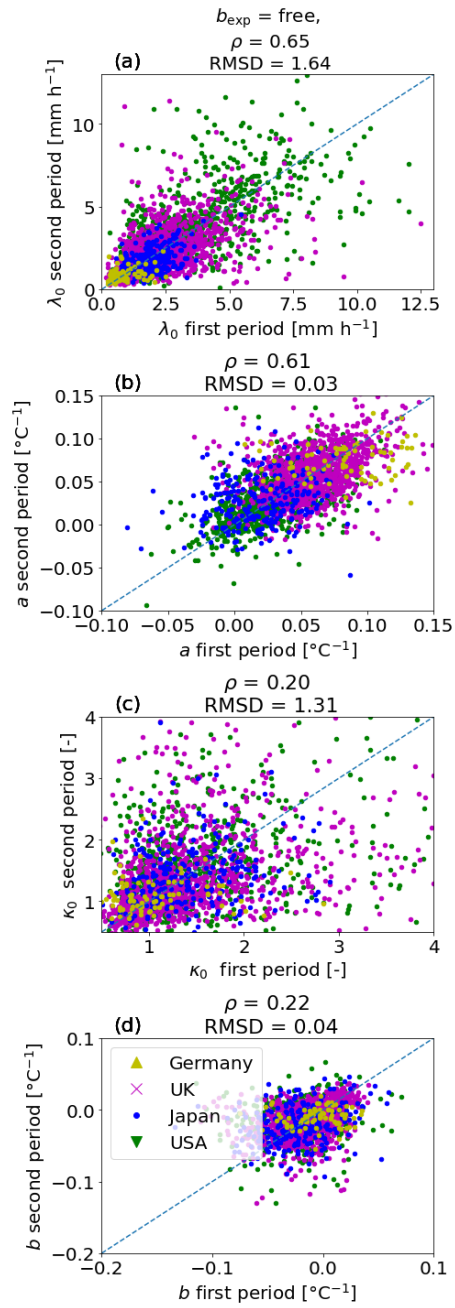

**Figure S5.** As Figure 3, but when  $b$  is fitted using an exponential dependence.

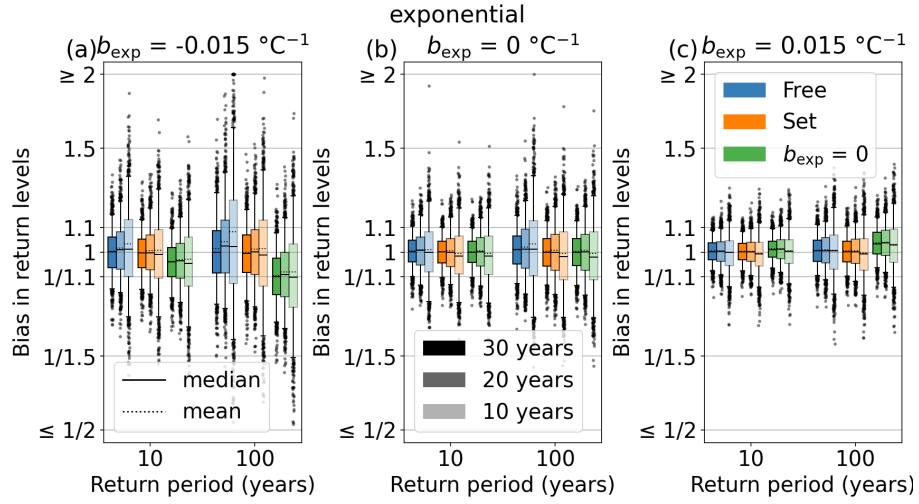

**Figure S6.** As Figure 5, but when  $b$  is fitted using an exponential dependence.

**Table S1.** The average values of the parameters in the magnitude model ( $\lambda_0$ ,  $a$ ,  $\kappa_0$ ,  $b$ ), and the temperature model ( $\mu$ ,  $\sigma$ ). Also, the average number of events per station and the total number of stations in each region. These values were used to produce the Monte Carlo generated events in Figure 2.

|                                      | Japan  | UK     | Germany | USA    |
|--------------------------------------|--------|--------|---------|--------|
| $\lambda_0$                          | 2.29   | 1.84   | 1.05    | 1.39   |
| $\lambda_0, b = 0$                   | 1.75   | 1.42   | 0.79    | 3.03   |
| $a$                                  | 0.062  | 0.027  | 0.071   | 0.031  |
| $a, b = 0$                           | 0.072  | 0.047  | 0.083   | 0.039  |
| $\kappa_0$                           | 1.29   | 1.34   | 1.12    | 1.39   |
| $\kappa_0, b = 0$                    | 1.01   | 1.03   | 0.92    | 1.13   |
| $b$                                  | -0.013 | -0.024 | -0.012  | -0.015 |
| $\mu$                                | 11.6   | 9.2    | 9.7     | 11.4   |
| $\sigma$                             | 12.9   | 8.5    | 12.9    | 15.2   |
| Average number of events per station | 2116   | 1387   | 989     | 1211   |
| Number of stations ( $M$ )           | 1207   | 913    | 696     | 1386   |

**Table S2.** Ratios between the interquartile ranges of observed and generated parameters when using an exponential shape parameter. As Table 1 for " $b = \text{free}$ ".

| Parameter   | Germany | Japan | UK   | US   |
|-------------|---------|-------|------|------|
| $\lambda_0$ | 0.91    | 0.52  | 0.54 | 0.40 |
| $a$         | 0.85    | 0.55  | 0.67 | 0.46 |
| $\kappa_0$  | 1.01    | 0.53  | 0.59 | 0.60 |
| $b$         | 0.93    | 0.51  | 0.65 | 0.65 |

**Table S3.** The ratio of the interquartile range of the generated parameters to the interquartile range of the observed parameters in each country. When the number of events at each station is the same, and the average.

| Parameter   | $b = \text{free}$ |       |      |      | $b = 0$ |       |      |      |
|-------------|-------------------|-------|------|------|---------|-------|------|------|
|             | Germany           | Japan | UK   | US   | Germany | Japan | UK   | US   |
| $\lambda_0$ | 0.90              | 0.48  | 0.56 | 0.36 | 0.59    | 0.40  | 0.33 | 0.25 |
| $a$         | 0.82              | 0.58  | 0.68 | 0.38 | 0.71    | 0.37  | 0.42 | 0.25 |
| $\kappa_0$  | 0.84              | 0.41  | 0.54 | 0.58 | 0.79    | 0.52  | 0.59 | 0.42 |
| $b$         | 0.91              | 0.47  | 0.54 | 0.70 | -       | -     | -    | -    |

**Table S4.** Ratios between the interquartile ranges of observed and generated parameters when using the exponential shape parameter.

| Parameter   | Germany | Japan | UK   | US   |
|-------------|---------|-------|------|------|
| $\lambda_0$ | 0.90    | 0.47  | 0.46 | 0.35 |
| $a$         | 0.83    | 0.49  | 0.55 | 0.37 |
| $\kappa_0$  | 0.99    | 0.55  | 0.60 | 0.64 |
| $b$         | 0.89    | 0.49  | 0.60 | 0.60 |
